# Supplementary material
Source: publisher site journal article supplement (https://www.dovepress.com/article/389582)
Supplement: Supplementary file 1 [file get_supplementary_file.php]

**The questionnaire**

1. **Please select your gender?** Male Female
2. **How old are you (Please write it down)?** --------------------------
3. **Are you aware about the availability of Covid-19 Vaccine in Kabul?** Yes No
4. **Have you already received vaccine for Covid-19 virus?** Yes No
5. **If you did not received the vaccine, Are you eager to receive the vaccine?** Yes No
6. **If you are already vaccinated for covid-19 or willing to receive the vaccine what are your reason (you can select multiple answers)?**

- To protect me from covid-19 infection
- To protect others from covid-19 infection
- I trust in immunization
- To eradicate the virus and put an end to the pandemic
- Vaccination is advised by medical experts
- To be able to travel
- It is my social and ethical responsibility
- It is free of charges
- It is available
- Vaccination is effective
- Vaccination is safe
- Vaccination is recommended by authorities
- To be able to continue my duty as a doctor
- I am at risk of severe form of disease

1. **If you are not willing to receive the covid-19 vaccine what are your reasons (you can select multiple answers)?**

- I am concerned about adverse effects and safety
- I heard negative news about the vaccine
- The vaccine is not effective
- My immunity is enough competent
- There is no need for the vaccine
- The Ministry of Public Health did not provide enough information about the vaccine
- I am afraid of needle
- I do not know the location of vaccination centres
- Others have experienced the adverse effect
- There is a chip in the vaccine

1. **Will you encourage your family members, friends and classmates to receive the covid-19 vaccine?** Yes No
2. **From which sources you have received negative information about the Covid-19 Vaccine?**

- Social Media
- Friends
- Medical Experts
- Family
- Lecturers

1. Have you contracted the Covid-19 virus in the past?

- Yes I am sure about contracting the COVID-19 infection in the past,
- I am not sure but may have contracted the Covid-19 virus in the past
- No I have not contract the Covid-19 virus in the past

**Note**: Adapted from El-Elimat, T., AbuAlSamen, M. M., Almomani, B. A., Al-Sawalha, N. A., & Alali, F. Q. (2021). Acceptance and attitudes toward COVID-19 vaccines: A cross-sectional study from Jordan. *PLoS One, 16*(4), e0250555. Creative Commons.
